# Supplementary material for: Clusters of Pregnant Women with Severe Acute Respiratory Syndrome Due to COVID-19: An Unsupervised Learning Approach
Source: MDPI journal article supplement (doi:10.3390/ijerph192013522), 2022-10-19

1<sup>st</sup> Step: data pre-processing

Raw dataset (input)

$I_i$ : individual,  $i = 1, \dots, n$

$V_j$  = categorical variable,  $j = 1, \dots, m$

|       | $V_1$ | $V_2$ | ... | $V_j$ |
|-------|-------|-------|-----|-------|
| $I_1$ |       |       |     |       |
| $I_2$ |       |       |     |       |
| ...   |       |       |     |       |
| $I_i$ |       |       |     |       |

Multiple  
Correspondence  
Analysis

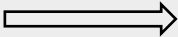

Multiple Correspondence Analysis result

$PC_j$  = Principal Component (continuous variable),  $j = 1, \dots, m$

|       | $PC_1$ | $PC_2$ | ... | $PC_j$ |
|-------|--------|--------|-----|--------|
| $I_1$ |        |        |     |        |
| $I_2$ |        |        |     |        |
| ...   |        |        |     |        |
| $I_i$ |        |        |     |        |

Threshold  
Inertia percentage  
(at least 50%)

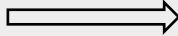

Dataset for Hierarchical clustering (output)

Selected  $PC$ ,  $k < j$

$PC_k$ ,  $k = 1, \dots, p$

|       | $PC_1$ | $PC_2$ | ... | $PC_k$ |
|-------|--------|--------|-----|--------|
| $I_1$ |        |        |     |        |
| $I_2$ |        |        |     |        |
| ...   |        |        |     |        |
| $I_i$ |        |        |     |        |

2<sup>nd</sup> Step: Hierarchical Cluster Analysis

Dataset for Hierarchical clustering (input)

Selected  $PC$ ,  $k < j$

$PC_k$ ,  $k = 1, \dots, p$

|       | $PC_1$ | $PC_2$ | ... | $PC_k$ |
|-------|--------|--------|-----|--------|
| $I_1$ |        |        |     |        |
| $I_2$ |        |        |     |        |
| ...   |        |        |     |        |
| $I_i$ |        |        |     |        |

Hierarchical  
Cluster Analysis

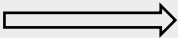

Starting agglomerative process:  
distance between  $p$ -dimensional  
observations

(Euclidian distance)

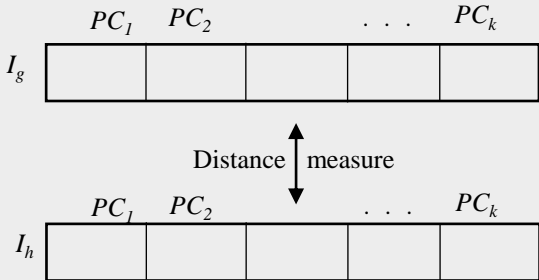

Ward's algorithm  
Agglomeration of  
clusters

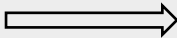

Hierarchical Cluster Analysis result

*Hierarchical tree* (output)

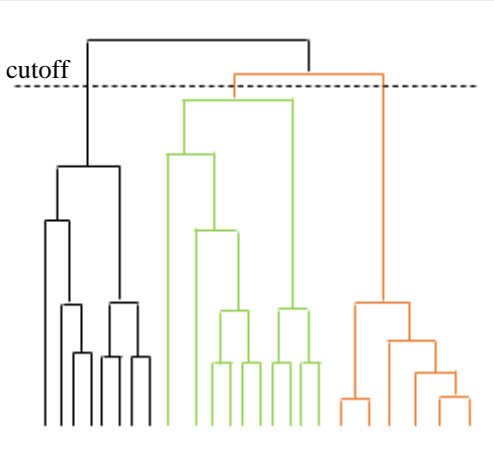

Supplement: s1 [file s1]
